# Supplementary material for: Nepal Ambient Monitoring and Source Testing Experiment (NAMaSTE): emissionsof trace gases and light-absorbing carbon from wood and dung cooking fires,garbage and crop residue burning, brick kilns, and other sources
Source: Copernicus journal article supplement (doi:10.5194/acp-16-11043-2016), 2016-09-07
Supplement: Supplementary file 1 [file acp-16-11043-2016-supplement.zip]

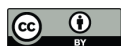

## *Supplement of*

# **Nepal Ambient Monitoring and Source Testing Experiment (NAMaSTE): emissions of trace gases and light-absorbing carbon from wood and dung cooking fires, garbage and crop residue burning, brick kilns, and other sources**

Chelsea E. Stockwell et al.

*Correspondence to:* Robert J. Yokelson (bob.yokelson@umontana.edu)

- acp-16-11043-2016-supplement-title-page.pdf
- acp-2016-154-sp.xlsx

The copyright of individual parts of the supplement might differ from the CC-BY 3.0 licence.
